# Supplementary material
Source: publisher site journal article supplement (https://www.spandidos-publications.com/6379/downloadSupplementary)

Figure S1. Pathohistological images of patients with recurrent or metastatic oral squamous cell carcinoma. Staining examples of (A) PD-L1 negative and (B) PD-L1 positive (magnification, x200). PD-L1, programmed cell death ligand 1; CPS, combined positive score.

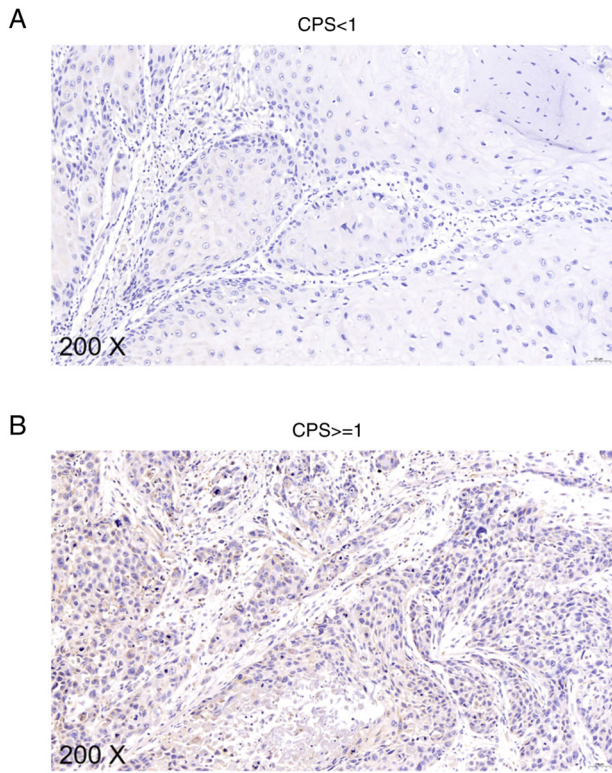

Figure S2. Association of primary tumor location with PFS and OS in patients with R/M OSCC. Primary tumor location was not linked with (A) PFS or (B) OS in patients with R/M OSCC. R/M, recurrent or metastatic; OSCC, oral squamous cell carcinoma; PFS, progression-free survival; OS, overall survival; CI, confidence interval; NA, not applicable.

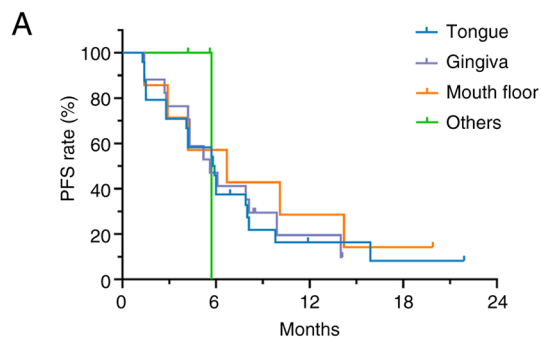

|                           | Primary tumor location |               |                |             |
|---------------------------|------------------------|---------------|----------------|-------------|
|                           | Tongue                 | Gingiva       | Month floor    | Others      |
| Log-rank test             | $P=0.869$              |               |                |             |
| Median (95% CI), (months) | 5.8 (4.1–7.5)          | 5.6 (3.2–8.0) | 6.7 (0.3–13.1) | 5.7 (NA-NA) |
| 12-months PFS (%)         | 16.4                   | 19.6          | 28.6           | NA          |
| 24-months PFS (%)         | 8.2                    | 9.8           | 14.3           | NA          |

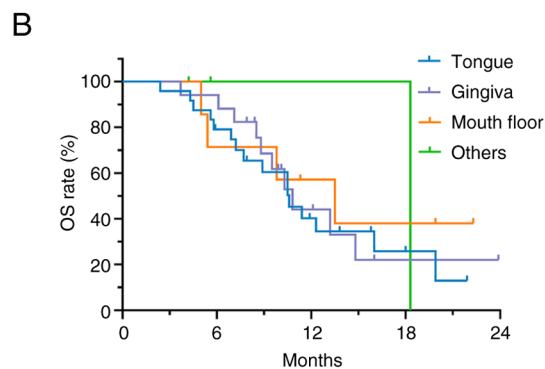

|                           | Primary tumor location |                 |                 |              |
|---------------------------|------------------------|-----------------|-----------------|--------------|
|                           | Tongue                 | Gingiva         | Month floor     | Others       |
| Log-rank test             | $P=0.834$              |                 |                 |              |
| Median (95% CI), (months) | 10.6 (8.0–13.2)        | 10.8 (8.8–12.8) | 13.5 (5.9–21.1) | 18.3 (NA-NA) |
| 12-months OS (%)          | 40.3                   | 44.1            | 57.1            | NA           |
| 24-months OS (%)          | 12.9                   | 22.1            | 38.1            | NA           |

Figure S3. Subgroup analysis for patients with recurrent or metastatic oral squamous cell carcinoma who received treatment in 2020-2022 and patients who received treatment in 2023. Comparison of (A) PFS and (B) OS between the PD-1 inhibitor + chemotherapy group and the standard treatment group in patients who received treatment in 2020-2022. Comparison of (C) PFS and (D) OS between the PD-1 inhibitor + chemotherapy group and the standard treatment group in patients who received treatment in 2023. PFS, progression-free survival; OS, overall survival; PD-1, programmed cell death 1.

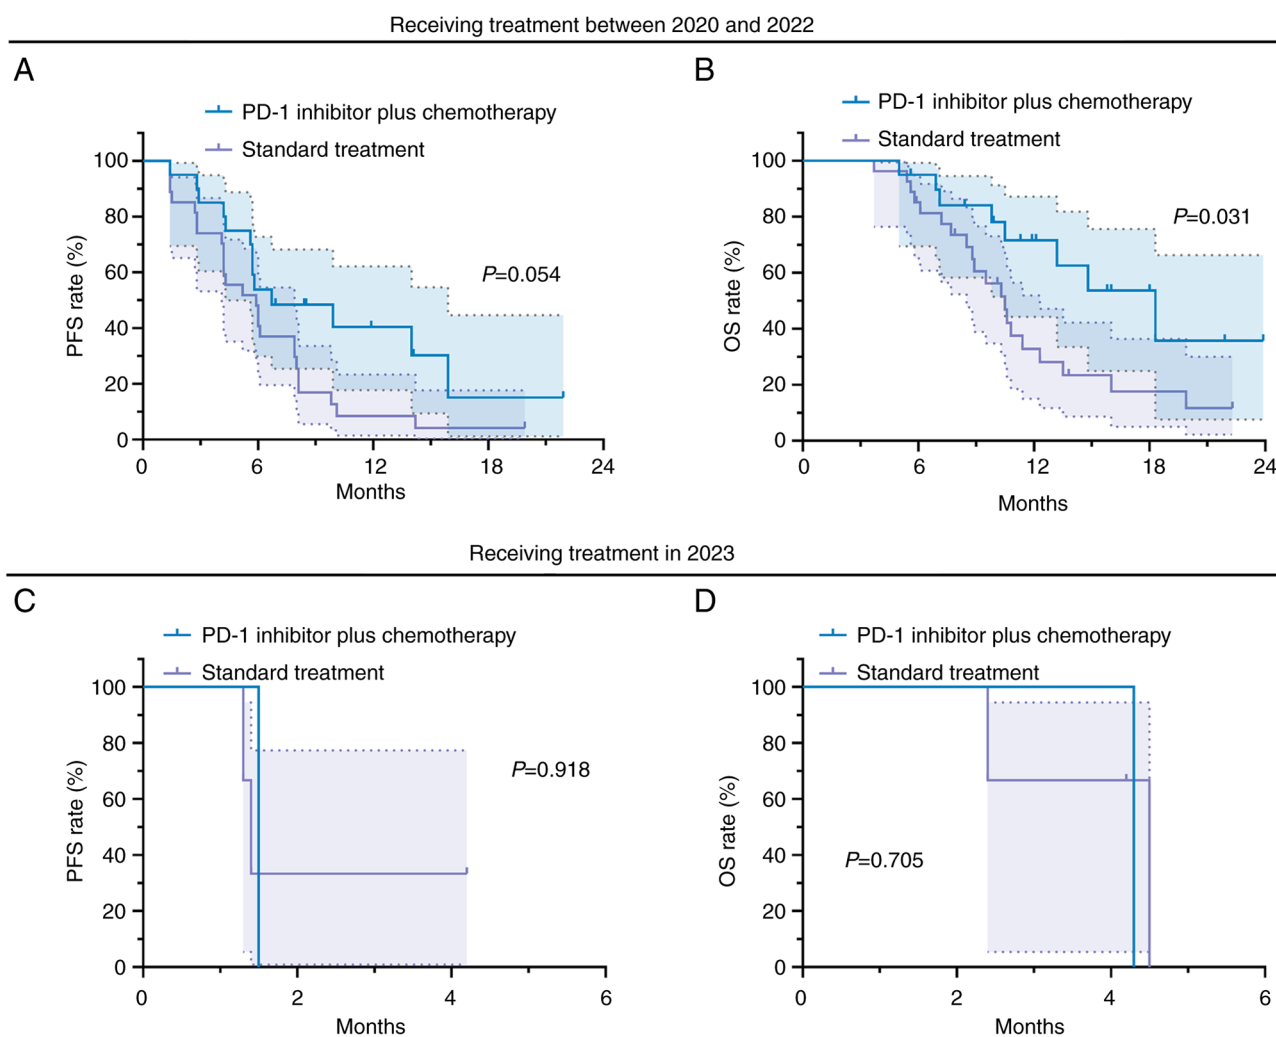

Supplement: Supplementary file 1 [file downloadSupplementary]
